# Supplementary material
Source: publisher figshare collection journal article supplement (https://frontiersin.figshare.com/ndownloader/files/28106805)
Supplement: Supplementary file [file 28106805]

## Supplementary Material

### 1 MAIN PUBLIC-HEALTH ACTIONS SUGGESTED BY THE MODELS.

As explained in the main text, the generalized SIR model is summarized by the set of differential equations:

$$\frac{dS(t)}{dt} = -\frac{(S(t))^n}{\tau_0} i(t) \quad (\text{S1})$$

$$\frac{dI}{dt} = \frac{(S(t))^n}{\tau_0} i(t) - \frac{I(t)}{\tau_1} \quad (\text{S2})$$

$$\frac{dR}{dt} = \frac{I(t)}{\tau_1} \quad (\text{S3})$$

We summarize a few known public-health actions suggested by the SIR model (Weiss, 2013) which are useful to follow the lines of reasoning developed in the paper.

1. Since the maximum value for  $R(\infty)$  is the entire population,  $N < \infty$ , the disease always dies out,  $I(t > t_0) = 0$ . Otherwise, if for some initial conditions we could have  $I(\infty) \neq 0$ , Eq. S3 would imply that  $R(t)$  could grow without limit since  $\frac{dR}{dt} > 0$ , which proves the fact by *reductio ad absurdum*.
2. For  $n = 1$  the ratio  $\mathfrak{R}_0 = \frac{\tau_1}{\tau_0}$  determines whether the disease grows or dies. Since  $S(t)$  can only decrease, we have from Eq. S2 that

$$\frac{dI}{dt} = \frac{S(t) i(t)}{\tau_0} - \frac{I(t)}{\tau_1} \leq \frac{1}{\tau_1} \left( \frac{\tau_1}{\tau_0} s(0) - 1 \right) I(t) = \frac{1}{\tau_1} (\mathfrak{R}_0 - 1) I(t) = \frac{I(t)}{\tau} \quad (\text{S4})$$

at the onset, for  $\mathfrak{R}_0 \gg 1$ , an initial estimation for  $\tau_0$  can be obtained from  $\tau \approx \tau_0$ .<sup>1</sup> Moreover, if  $\mathfrak{R}_0 < 1$ ,  $I(t)$  is a monotonically decreasing function and the infection dies quickly. On the other hand, if  $\mathfrak{R}_0 > 1$ ,  $I(t)$  increases in the region near  $t = 0$ , it reaches a maximum value,  $I_M(t_M)$ , and then it goes to zero, as proved in the point above.  $\mathfrak{R}_0$  is called the **basic reproductive number** and it sets up a non-obvious threshold for the expansion of the disease.

3. For  $n = 1$ , the maximum number of infected people can be obtained by dividing the two equations S1 and S2,

$$\frac{dS}{dI} = -\frac{s(t) I(t)}{\frac{s(t) I(t)}{\tau_0} - \frac{I(t)}{\tau_1}} \quad (\text{S5})$$

which can be integrated to yield for  $s(0) \approx 1$  and  $i(0) \approx \frac{1}{N}$ ,

$$i_M = 1 - \frac{1}{\mathfrak{R}_0} (1 + \ln \mathfrak{R}_0) \quad (\text{S6})$$

<sup>1</sup>  $s(0) \approx 1$  for large  $N$ .

4. Similarly, dividing the equation S1 by S3 ( $n = 1$ ), we get

$$\frac{dS}{dR} = -\mathfrak{R}_0 S \quad (S7)$$

i.e.,  $S(t) = S(0)e^{-\mathfrak{R}_0 R(t)}$ , assuming  $R(0) = 0$ . Notice that for  $\mathfrak{R}_0 \gg 1$ ,  $S(\infty)$  might get to the value zero, which corresponds to a very virulent epidemics where everybody dies.

The above considerations yield to the following public-health actions while dealing with an infectious disease (Figs. S1 and S2):

1. Reduce the contact rate or transmissibility,  $\frac{1}{\tau_0}$ , by isolating infectious nodes, encouraging frequent hand washing and the use of face masks. **Increasing values of  $\tau_0$  displace  $t_M$  towards larger times and decrease the value of  $I_M$ .**
2. Decrease  $\tau_1$  to reduce the duration of infection. **Increasing values of  $\tau_1$  displace  $t_M$  towards the origin and increase the value of  $I_M$ .**
3. Reduce  $N = S(0)$  by vaccination or any other kind of immunity. **Increasing  $S(0)$  displaces  $t_M$  towards larger values, decreases  $i_M$  and  $r_M$ .**
4. Decrease  $n$ . **Decreasing  $n < 1$  moves  $t_M$  towards larger values and, it decreases  $i_M$  and  $r_M$ .**

## REFERENCES

Weiss, H. (2013). The SIR model and the foundations of public health. *MatMat* 3, 1–17

## 2 SUPPLEMENTARY TABLES AND FIGURES

### 2.1 Figures

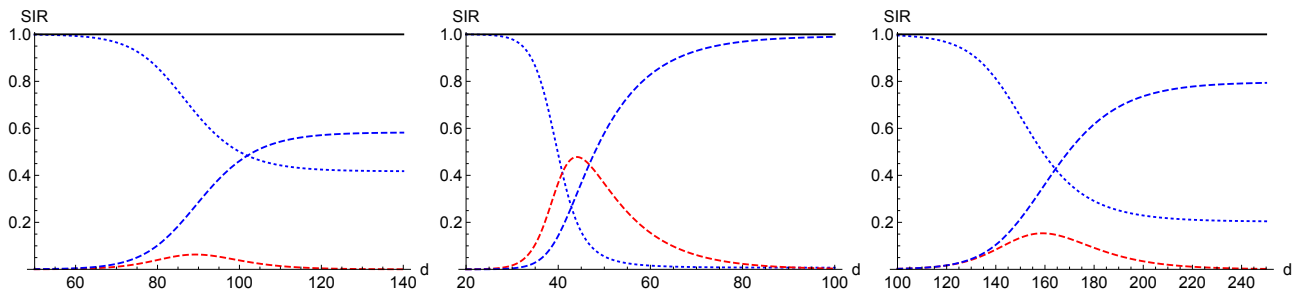

**Figure S1. Representative behaviour of the SIR model ( $n = 1$ ) depending on the parameters ( $\mathfrak{R}_0 \geq 1.5$ ).** Blue dotted:  $S(t)$ . Red dotted:  $I(t)$ . Blue dashed:  $R(t)$ . Initial conditions  $N = 10000000 = S(0) + 1$ ,  $I(0) = 1$ . Left to right: (I)  $\tau_1 = 2$ ,  $\tau_0 = 3$ ,  $t_M = 90$ ,  $r(\infty) = 0.58$ ; (II)  $\tau_1 = 2$ ,  $\tau_0 = 10$ ,  $t_M = 44$ ,  $r(\infty) = 0.99$ ; (III)  $\tau_1 = 5$ ,  $\tau_0 = 10$ ,  $t_M = 159$ ,  $r(\infty) = 0.80$ .

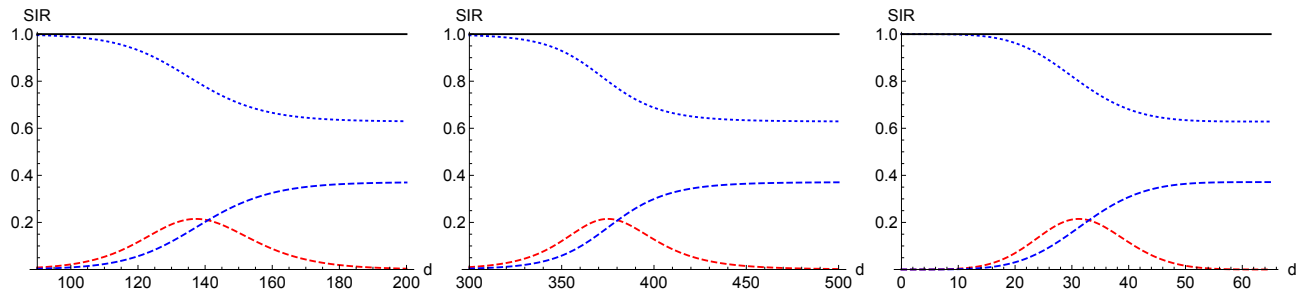

**Figure S2. Representative behaviour of the SIR model ( $n \neq 1$ ) depending on the parameters ( $\mathfrak{R}_0 \leq 1.5$ ).** Blue dotted:  $S(t)$ . Red dotted:  $I(t)$ . Blue dashed:  $R(t)$ . Initial conditions:  $N = 10000000 = S(0) + 1$ ,  $I(0) = 1$ . Parameters:  $\tau_1 = 2.5$ ,  $\tau_0 = 2$ ;  $\mathfrak{R}_0 = 1.25$ ,  $r(\infty) = 0.37$ . Left to right: (I)  $n = 1$ ,  $t_M = 137$ ; (II)  $n = 1.1$ ,  $t_M = 375$ ; (III)  $n = 0.818$ ,  $t_M = 31$ .
